# Supplementary material for: Design and biological characterization of novel cell-penetrating peptides preferentially targeting cell nuclei and subnuclear regions
Source: PubMed Central journal article supplement (PMC6009097; doi:10.3762/bjoc.14.116), 2018-06-07
Supplement: Beilstein_J_Org_Chem-14-1378-s001.pdf [file Beilstein_J_Org_Chem-14-1378-s001.pdf]

# **Supporting Information**

**for**

## **Design and biological characterization of novel cell- penetrating peptides preferentially targeting cell nuclei and subnuclear regions**

Anja Gronewold<sup>1</sup>, Mareike Horn<sup>1</sup> and Ines Neundorf\*<sup>1</sup>

Address: <sup>1</sup>Department of Chemistry, Biochemistry, University of Cologne, Zulpicher  
Str. 47a, 50674 Cologne, Germany

Email: Ines Neundorf - ines.neundorf@uni-koeln.de

\* Corresponding author

---

**Additional information**

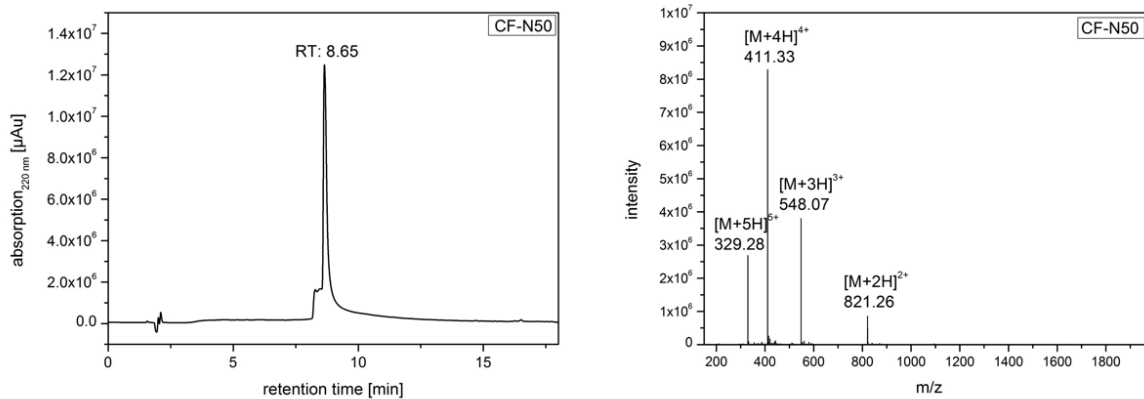

**Figure S1:** UV-chromatogram and ESI-MS spectrum of CF-labeled N50 after purification. The sample was recorded using a gradient from 10 to 60% ACN in water (incl. 0.1% TFA) within 15 min (for further details refer to experimental part). The shoulder at RT 8.5 in the UV-chromatogram corresponds to oxidized product.

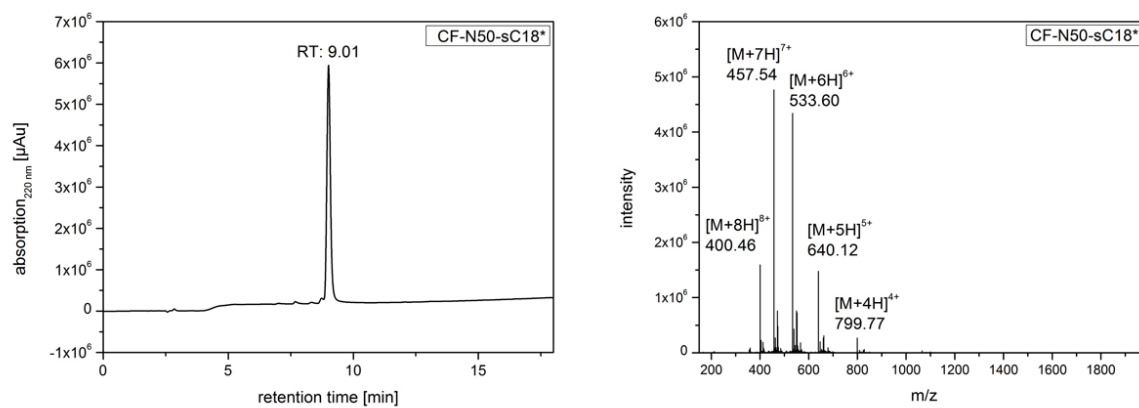

**Figure S2:** UV-chromatogram and ESI-MS spectrum of CF-labeled N50-sC18\* after purification. The sample was recorded using a gradient from 10 to 60% ACN in water (incl. 0.1% TFA) within 15 min (for further details refer to experimental part).

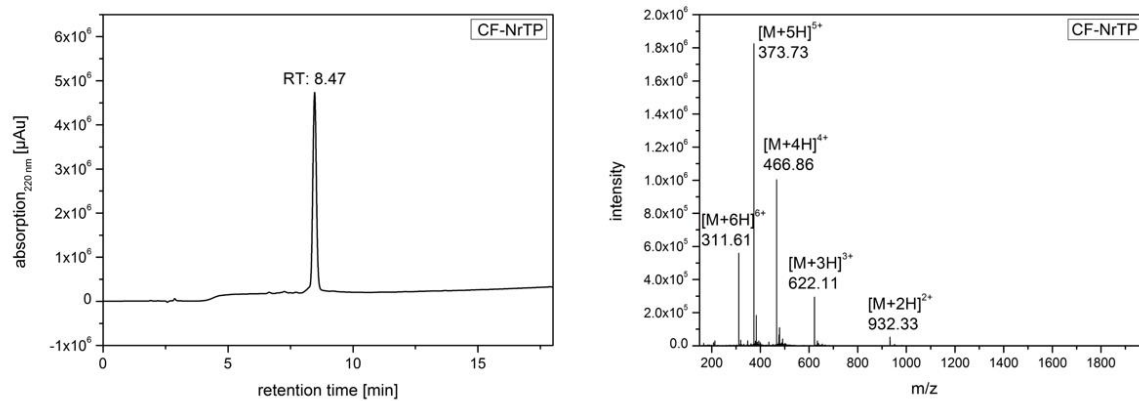

**Figure S3:** UV-chromatogram and ESI-MS spectrum of CF-labeled NrTP after purification. The sample was recorded using a gradient from 10 to 60% ACN in water (incl. 0.1% TFA) within 15 min (for further details refer to experimental part).

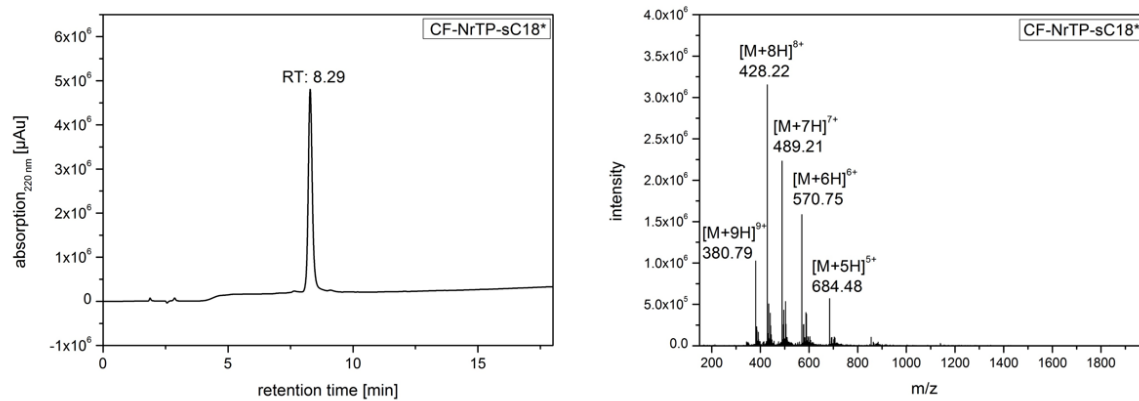

**Figure S4:** UV-chromatogram and ESI-MS spectrum of CF-labeled NrTP-sC18\* after purification. The sample was recorded using a gradient from 10 to 60% ACN in water (incl. 0.1% TFA) within 15 min (for further details refer to experimental part).

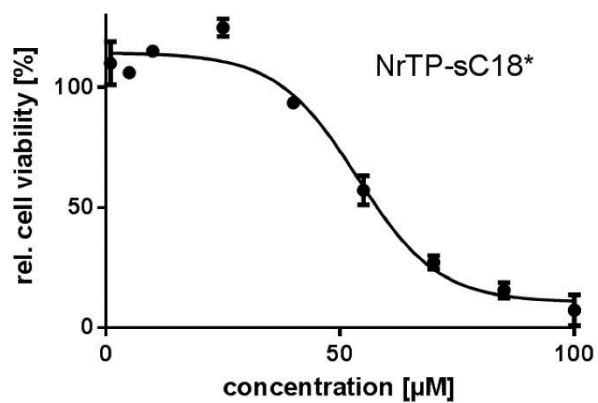

**Figure S5:** IC<sub>50</sub> determination of NrTP-sC18\* in HeLa cells (IC<sub>50</sub> = 53.72 ± 4.79 µM). Peptide solutions of 1, 5, 10, 25, 40, 55, 70, 85 and 100 µM were incubated with HeLa cells (24 h, 37 °C). Afterwards a resazurin-based cell viability assay was performed according to the experimental part.

## HeLa

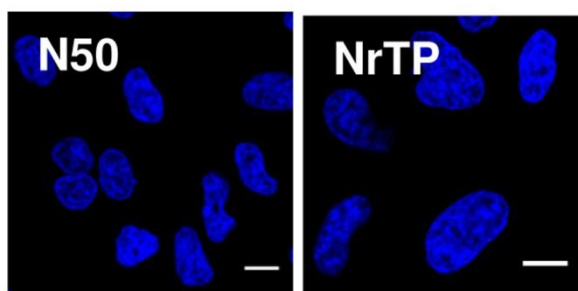

## MCF-7

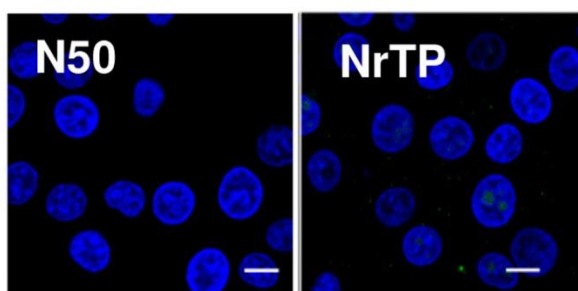

**Figure S6:** Cellular uptake of the control peptides N50 and NrTP in HeLa and MCF-7 cells. Cells were incubated for 30 min with 10  $\mu\text{M}$  of CF-labeled peptide solutions. Blue: Hoechst 33342 nuclear stain; scale bar is 10  $\mu\text{m}$ .

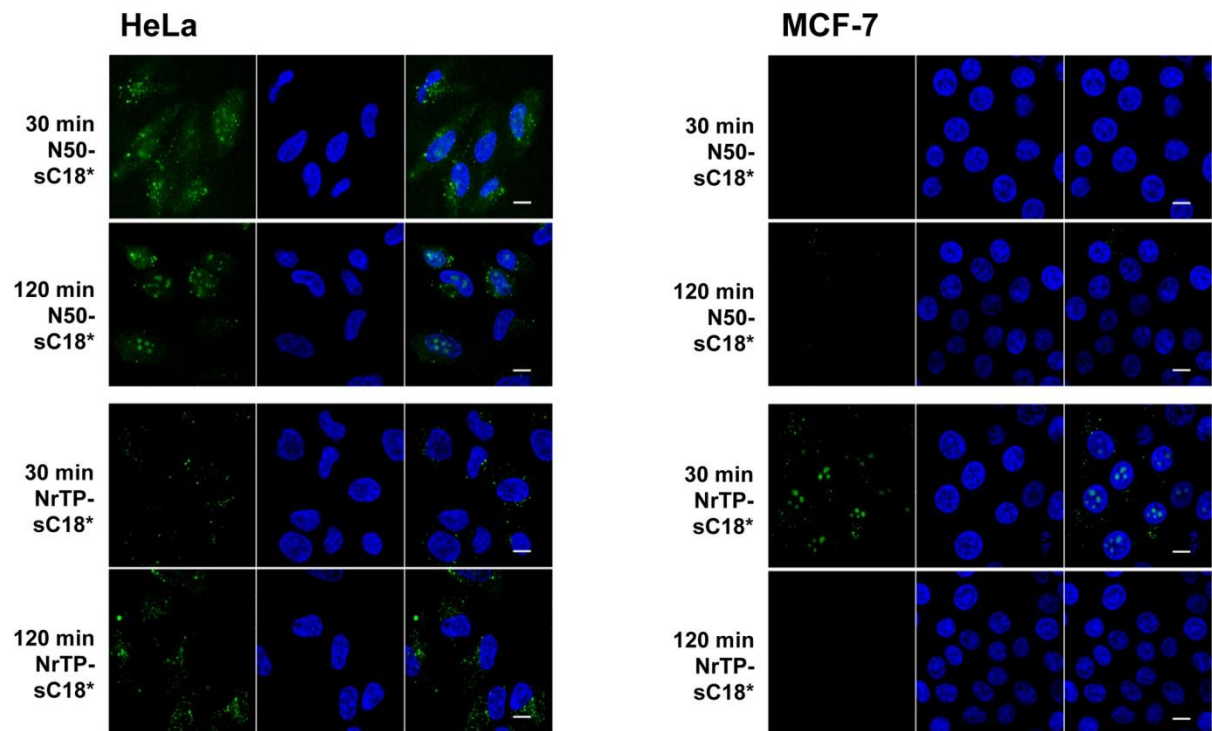

**Figure S7:** Internalization of the peptides in HeLa and MCF-7 cells. Cells were treated with 1  $\mu$ M CF-labeled peptide solutions for 30 or 120 min, respectively, at 37  $^{\circ}$ C. Green: CF-labeled peptide; blue: Hoechst 33342 nuclear stain; scale bar is 10  $\mu$ m.
